# Supplementary material
Source: PubMed Central journal article supplement (PMC2656143)
Supplement: 0812874106_0812874106SI.pdf [file 0812874106_0812874106SI.pdf]

# Supporting Information

Wikoff et al. 10.1073/pnas.0812874106

## SI Materials and Methods

**GC/MS Profiling.** We dried 8  $\mu\text{L}$  of methanol extracted plasma by using a SpeedVac in a glass vial, and 75  $\mu\text{L}$  of BSTFA + 1% TMCS (Pierce) was added, capped, and incubated at 37 °C for 1 h. This mixture was transferred to a GC autosampler vial with a 100- $\mu\text{L}$  glass insert; 2.5  $\mu\text{L}$  was injected without a split into an Agilent 6890 GC/MS instrument equipped with a HP5-MS column (J&W Scientific/Agilent) with a length of 30 m, ID of 0.25 mm, and film thickness of 0.25  $\mu\text{m}$ . The injector port temperature was 290 °C and the transfer line temperature was 280 °C. The flow rate was 1.2 mL/min with a total run time of 27.5 min. The temperature program was 50 °C for 5 min, followed by a gradient of 5 °C per minute to 300 °C, followed by a hold at 300 °C for 10 min for a total run time of 55 min per sample. A 20-min blank run was included between each sample. The mass spectrometer was scanned from  $m/z$  50 to 700.

**APCI Profiling.** For APCI-TOF profiling, 5  $\mu\text{L}$  of methanol-extracted plasma was injected onto a SB-C18 Zorbax column (Agilent) 2.1-mm ID  $\times$  150-mm length at a flow rate of 250  $\mu\text{L}/\text{min}$ . Mobile phase A was  $\text{H}_2\text{O}$  + 0.1% formic acid, and B was MeOH + 0.1% formic acid, with a gradient from 10% to 95% B from 2 to 30 min, and to 10% B from 33 to 40 min. A standard APCI source was used with a capillary voltage of 4,000 V, 35 psig nebulizer, 6.0 L/min drying gas, a vaporizer temp of 325 °C with a gas temperature of 350 °C and a corona discharge of 6  $\mu\text{A}$ , and fragmentor of 125 V. The TOF was scanned from  $m/z$  50 to 500. The injection order was alternated between the 2 groups of samples, and a 20-min gradient wash was run between each sample. Samples were profiled by using APCI positive mode with the TOF (Agilent, model 6210).

**Microbial Cultures to Assess Indole-3-Propionic Acid (IPA) Production.** Microbial strains were grown under anaerobic conditions according to ATCC guidelines until the culture achieved an  $\text{OD}_{600}$  of  $\approx 1.0$  or maximal density if the microbe could not achieve  $\text{OD}_{600}$  of  $\approx 1.0$  in broth culture. See Table S2 for a list of strains used in the study; 1 mL of culture was filtered with a 0.2- $\mu\text{m}$  filter and stored at  $-80$  °C. Samples were brought to room temperature, and a 50- $\mu\text{L}$  aliquot was methanol extracted and prepared for LC/MS as were the serum samples. Samples were examined for detectable quantities of IPA. IPA was detected in all *Clostridium sporogenes* isolates under all growth conditions screened. *C. sporogenes* ATCC 15579 was selected for further experimentation due to the availability of its genomic sequence.

**Mouse Colonization Experiments.** All experiments involving live animals were approved by the institutional review board (IACUC) and conducted in an AALAS-accredited facility.

We aseptically introduced 12 female GF Swiss Webster mice age 6–8 week (Taconic) into semirigid isolators (Charles River

Labs), were maintained on irradiated Pico-Vac Lab Rodent Diet (Purina), and given autoclaved water ad libitum. Nine mice were given a 100- $\mu\text{L}$  suspension of *C. sporogenes* (ATCC 15579) produced from an overnight TSB culture diluted 1:100 in LB containing 40% glycerol. Two animals were removed from the isolator at 0, 5, and 10 days postinoculation, and were anesthetized with isoflurane, 50  $\mu\text{L}$  of blood was collected retro-orbitally into clay capped capillary tubes, and, while under anesthesia, animals were euthanized by cervical dislocation. Also, 3 animals were treated in a similar manner 24 h postinoculation. Three animals were maintained as GF for 10 days and had blood drawn as above to serve as controls. Serum was separated from blood cells, methanol extracted, and analyzed as described previously.

**IPA Clearance Studies.** All experiments involving live animals were approved by the institutional review board (IACUC) and conducted in an AALAS-accredited facility.

We ordered 20 GF Swiss Webster female mice aged 6–8 weeks from Taconic Farms. Animals were removed from the GF shipper 24 h after arrival and placed in a biosafety cabinet that had been decontaminated with 3% Nolvasan. The mice were randomly divided into four groups ( $n = 5$  animals per group) and administered 10, 20, 40 mg/kg IPA (Acros Organics) or sterile PBS vehicle by i.p. injection. Animals were anesthetized with isoflurane (Henry Schein), and had 50  $\mu\text{L}$  of blood drawn retro-orbitally at 0, 2, and 6 h postinjection. Serum was separated from blood cells by centrifugation of capillary tubes for 2 min in a BD Adams Autocrit Ultra 3 Centrifuge, tubes were broken above the blood cell-serum interface, and the serum layer was collected into capped tubes. The serum was then methanol extracted and analyzed for the presence of IPA. All experiments involving live animals were approved by the institutional review board (IACUC) and conducted in an AALAS-accredited facility.

**IPA Quantitation in Mouse Serum.** Samples were prepared as described above. LC/MS data were recorded by using an Agilent 6520 Accurate-Mass Q-TOF LC/MS system with dual ESI source and an Agilent 1200 HPLC system; 10  $\mu\text{L}$  was injected onto column (Agilent Zorbax 300SB-C18, 5  $\mu\text{m}$ , 150  $\times$  2.0 mm). Eluent A was 0.1% (vol/vol) formic acid in water; eluent B was 0.1% (vol/vol) formic acid in acetonitrile. The gradient consisted of 5% B for 5 min, followed by a gradient to 95% B  $>45$  min, hold at 95% B for 5 min, and a reequilibration at 5% B for 10 min. The flow rate was 200  $\mu\text{L}/\text{min}$ . The mass spectrometric data were collected in profile mode by using  $-$ ESI. The gas temperature was 350 °C. The drying gas flow rate was 5 L/min, and the pressure of the nitrogen nebulizer gas was 30 psig. The capillary, fragmentor, skimmer, and OCT1 RF Vpp voltages were 3,500 V ( $-$ ), 150 V, 65 V, and 750 V, respectively. A calibration curve was made by running IPA standard solutions of 50, 200, 500, and 1,000 ng/mL.



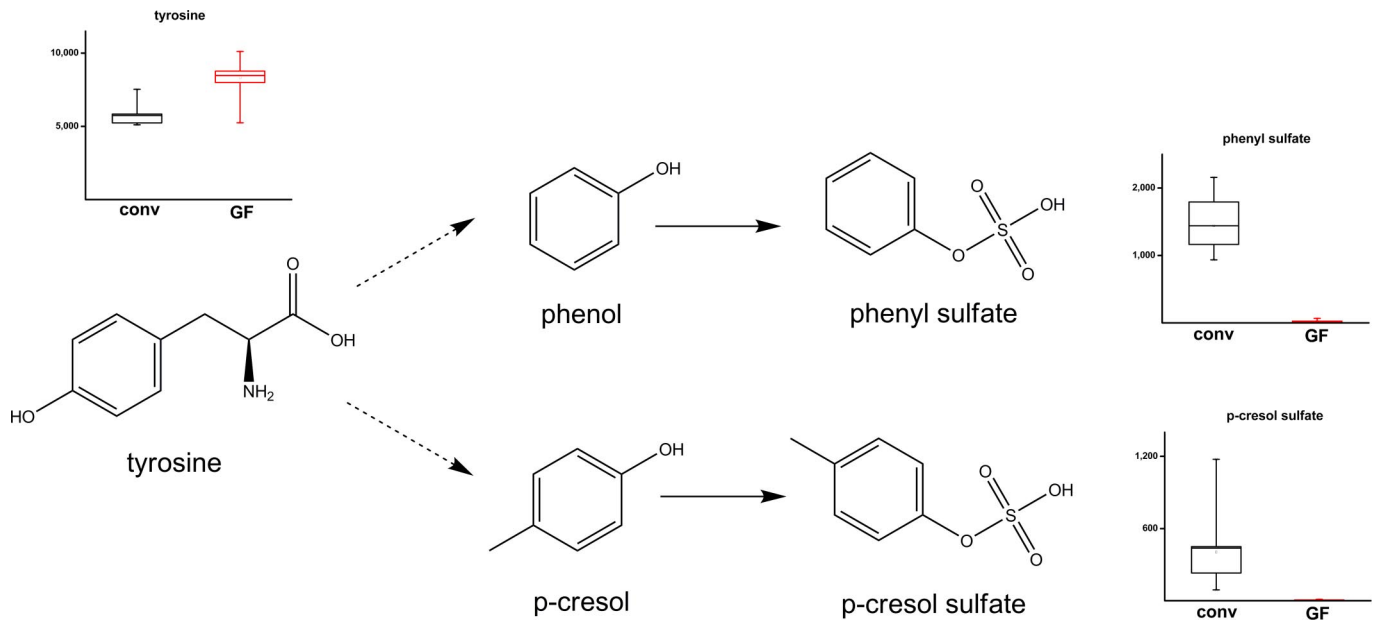

**Fig. S2.** Differences in metabolites that arise due to the action of the microbiome on tyrosine metabolism. The integrated signal intensities plotted on the y axes are reduced by a factor of 1,000.

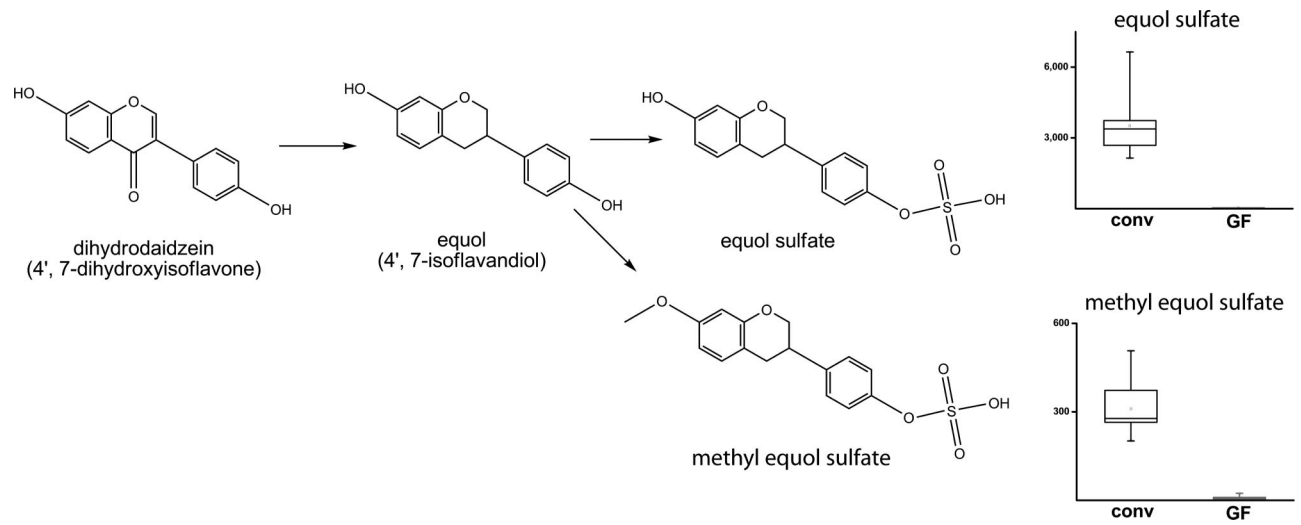

**Fig. S3.** Differences in metabolites that arise due to the action of the microbiome on the dietary isoflavone dihydrodaidzein. The integrated signal intensities plotted on the y axes are reduced by a factor of 1,000.

Table S1. Summary of mass spectrometric measurements based on which molecular identifications were made

| Compound ID                | Molecular formula                                             | Mode observed            | M | <i>m/z</i> obs | <i>m/z</i> calc, neutral | ppm error | RT, min | CE | Major fragments, QTOF                                           |
|----------------------------|---------------------------------------------------------------|--------------------------|---|----------------|--------------------------|-----------|---------|----|-----------------------------------------------------------------|
| Indole compounds           |                                                               |                          |   |                |                          |           |         |    |                                                                 |
| Tryptophan                 | C <sub>11</sub> H <sub>12</sub> N <sub>2</sub> O <sub>2</sub> | ESI +, ESI -, AP +, GCMS | + | 205.0958       | 204.0898                 | -9.28     | 7.8     | 35 | 118.069, 91.058, 143.077, 130.07                                |
| <i>N</i> -acetyltryptophan | C <sub>13</sub> H <sub>14</sub> N <sub>2</sub> O <sub>3</sub> | ESI +                    | + | 247.1061       | 246.1004                 | -8.77     | 18.7    | 25 | 159.096, 146.064, 132.083, 170.064, 188.076, 118.069            |
| Indoxyl sulfate (indican)  | C <sub>8</sub> H <sub>7</sub> NO <sub>4</sub> S               | ESI -                    | - | 212.0032       | 213.0095                 | —         | 5.5     | —  | +132.044, 79.959                                                |
| Serotonin                  | C <sub>10</sub> H <sub>12</sub> N <sub>2</sub> O              | ESI +, AP +              | + | 177.1008       | 176.0949                 | -11.22    | 5.1     | 35 | 115.054, 159.068, 133.053, 105.068, 77.039                      |
| Indole-3-propionic acid    | C <sub>11</sub> H <sub>11</sub> NO <sub>2</sub>               | ESI +, ESI -, AP +       | + | 190.0851       | 189.0789                 | -8.96     | 23.1    | —  | 130.064, 103.054, 77.039, 55.018                                |
| Phenyl compounds           |                                                               |                          |   |                |                          |           |         |    |                                                                 |
| Phenylalanine              | C <sub>9</sub> H <sub>11</sub> NO <sub>2</sub>                | ESI +, ESI -, AP +       | + | 166.0849       | 165.0789                 | -11.46    | 4.8     | —  | 120.0801, 103.0540, 91.0544, 77.0388                            |
| Tyrosine                   | C <sub>9</sub> H <sub>11</sub> NO <sub>3</sub>                | AP +, ESI +              | + | 182.0804       | 181.0739                 | -7.24     | 2.2     | 35 | 119.0500, 107.0502, 95.0501, 91.0556, 77.0389, 65.0386, 56.9438 |
| Hippuric acid              | C <sub>9</sub> H <sub>9</sub> NO <sub>3</sub>                 | ESI -, AP +              | - | 178.0515       | 179.0582                 | 6.08      | 4.5     | 10 | 134.061, 77.041                                                 |
| Phenylacetyl glycine       | C <sub>10</sub> H <sub>11</sub> NO <sub>3</sub>               | ESI +, AP +              | - | 194.0795       | 193.0738                 | -11.43    | 12.1    | —  | 91.058, 65.042                                                  |
| Phenyl sulfate             | C <sub>6</sub> H <sub>6</sub> O <sub>4</sub> S                | ESI -                    | - | 172.9920       | 173.9986                 | 6.62      | 5.5     | —  | +93.035, 79.957                                                 |
| <i>p</i> -Cresol sulfate   | C <sub>7</sub> H <sub>8</sub> O <sub>4</sub> S                | ESI -                    | - | 187.0080       | 188.0143                 | 7.99      | 8.3     | —  | +80, 107                                                        |
| Phenylpropionyl glycine    | C <sub>11</sub> H <sub>13</sub> NO <sub>3</sub>               | ESI +                    | + | 208.0952       | 207.0895                 | -10.4     | 17.4    | 35 | —                                                               |
| Cinnamoyl glycine          | C <sub>11</sub> H <sub>11</sub> NO <sub>3</sub>               | ESI +, ESI -             | + | 206.0802       | 205.0738                 | -7.37     | 19.2    | 35 | 103.0542, 77.0394, 131.04803                                    |
| Others                     |                                                               |                          |   |                |                          |           |         |    |                                                                 |
| Urate                      | C <sub>5</sub> H <sub>4</sub> N <sub>4</sub> O <sub>3</sub>   | ESI -, AP +              | - | 167.0215       | 168.0283                 | 5.90      | 3.7     | 25 | 69.0116, 124.0166, 96.0203                                      |
| Creatinine                 | C <sub>4</sub> H <sub>7</sub> N <sub>3</sub> O                | AP +                     | + | 114.0655       | 113.0589                 | -10.8     | 1.4     | —  | —                                                               |
| Equol sulfate              | C <sub>15</sub> H <sub>14</sub> SO <sub>6</sub>               | ESI -                    | - | 321.0426       | 322.0511                 | -2.13     | 21      | 25 | +241.0875, 147.0442, 135.0447, 121.0302, 119.0504, 79.9582      |
| Methyl equol sulfate       | C <sub>16</sub> H <sub>16</sub> SO <sub>6</sub>               | ESI -                    | - | 335.0621       | 336.0667                 | 9.44      | 25.2    | 25 | +255.1032, 121.0309, 79.9587, 59.0099                           |

M refers to the ESI ionization mode used for peak integration and compound identification. RT, retention time. CE refers to the collision energy employed to obtain the tandem MS spectra. All compounds identified as sulfates were also verified to have an isotope pattern for which the M + 2 peak was higher in intensity than expected compared with an isobaric species not containing sulfur.

**Table S2. Individual bacterial species and their culture conditions that were assayed for the production of IPA**

| Division       | Strain                                 | ATCC number(s)    | Growth medium                      |
|----------------|----------------------------------------|-------------------|------------------------------------|
| Actinobacteria | <i>Actinomyces odontolyticus</i> Batty | 17982             | BBL Actinomyces broth              |
| Actinobacteria | <i>Collinsella aerofaciens</i> Eggerth | 25986             | ATCC medium 1053                   |
| Archaea        | <i>Methanobrevibacter smithii</i>      | 35061             | ATCC medium 1340                   |
| Bacteroidetes  | <i>Alistipes putredinis</i>            | 29800             | ATCC medium 1490                   |
| Bacteroidetes  | <i>Bacteroides caccae</i>              | 43185             | BBL cooked meat medium             |
| Bacteroidetes  | <i>Bacteroides capillosus</i>          | 29799             | BBL cooked meat medium             |
| Bacteroidetes  | <i>Bacteroides ovatus</i>              | 8483              | BBL cooked meat medium             |
| Bacteroidetes  | <i>Bacteroides stercoris</i>           | 43183             | BBL cooked meat medium             |
| Bacteroidetes  | <i>Bacteroides thetaiotaomicron</i>    | 29148             | BBL cooked meat medium             |
| Bacteroidetes  | <i>Bacteroides uniformis</i>           | 8492              | BBL cooked meat medium             |
| Bacteroidetes  | <i>Parabacteroides merdae</i>          | 43184             | BBL cooked meat medium             |
| Firmicutes     | <i>Clostridium leptum</i>              | 29065             | ATCC medium 1490                   |
| Firmicutes     | <i>Clostridium ramosum</i>             | 25582             | ATCC medium 38                     |
| Firmicutes     | <i>Clostridium scindens</i>            | 35704             | ATCC medium 1053                   |
| Firmicutes     | <i>Clostridium sporogenes</i>          | 17888, 319, 15579 | TSB broth, BBL cooked meat medium* |
| Firmicutes     | <i>Clostridium symbiosum</i>           | 14940             | ATCC medium 1490                   |
| Firmicutes     | <i>Coprococcus eutactus</i>            | 27759             | ATCC medium 735                    |
| Firmicutes     | <i>Eubacterium dolichum</i>            | 29143             | ATCC medium 593                    |
| Firmicutes     | <i>Eubacterium ventriosum</i> Tissier  | 27560             | ATCC medium 593                    |
| Firmicutes     | <i>Micromonas micros</i>               | 33270             | ATCC medium 1102                   |
| Firmicutes     | <i>Ruminococcus gnavus</i>             | 29149             | ATCC medium 1490                   |
| Firmicutes     | <i>Ruminococcus obeum</i>              | 29174             | ATCC medium 1490                   |
| Firmicutes     | <i>Ruminococcus torques</i>            | 27756             | ATCC medium 735                    |
| Proteobacteria | <i>Escherichia coli</i>                | 700926, 700891    | TSB broth                          |

\*ATCC number 15579 was tested in both media and was able to grow and produce IPA in both media

**Table S3. Serum concentration of IPA measured in plasma samples after intraperitoneal injection of IPA**

| Treatment    | Animal no.    | IPA post-injection conc.,<br>$\mu\text{g/mL}$ |       |      |
|--------------|---------------|-----------------------------------------------|-------|------|
|              |               | 0 h                                           | 1 h   | 6 h  |
| Vehicle      | 1             | 0.00                                          | 0.00  | 0.08 |
|              | 2             | 0.00                                          | 0.00  | 0.00 |
|              | 3             | 0.00                                          | 0.00  | 0.00 |
|              | 4             | 0.00                                          | 0.00  | 0.00 |
|              | 5             | 0.00                                          | 0.00  | 0.00 |
|              | Vehicle mean  | 0.00                                          | 0.00  | 0.02 |
|              | Vehicle SD    | 0.00                                          | 0.00  | 0.04 |
| 10 mg/kg IPA | 1             | 0.00                                          | 18.24 | 0.78 |
|              | 2             | 0.00                                          | 22.76 | 0.79 |
|              | 3             | 0.00                                          | 20.70 | 0.89 |
|              | 4             | 0.00                                          | 26.70 | —    |
|              | 5             | 0.00                                          | —     | —    |
|              | 10 mg/kg mean | 0.00                                          | 22.10 | 0.82 |
|              | 10 mg/kg SD   | 0.00                                          | 3.58  | 0.06 |
| 20 mg/kg IPA | 1             | 0.00                                          | 31.09 | 0.53 |
|              | 2             | 0.00                                          | 33.24 | 1.42 |
|              | 3             | 0.00                                          | 57.06 | 1.66 |
|              | 4             | 0.00                                          | 31.16 | 0.09 |
|              | 5             | 0.00                                          | 24.25 | 1.11 |
|              | 20 mg/kg mean | 0.00                                          | 35.36 | 0.96 |
|              | 20 mg/kg SD   | 0.00                                          | 12.60 | 0.64 |
| 40 mg/kg IPA | 1             | 0.00                                          | 35.43 | 0.91 |
|              | 2             | 0.06                                          | —     | —    |
|              | 3             | 0.00                                          | 53.81 | 3.87 |
|              | 4             | 0.00                                          | 33.22 | 2.49 |
|              | 5             | 1.60                                          | 55.03 | 4.31 |
|              | 40 mg/kg mean | 0.33                                          | 44.37 | 2.90 |
|              | 40 mg/kg SD   | 0.71                                          | 11.65 | 1.53 |

All values are in  $\mu\text{g/mL}$  of serum, and the limit of detection was 0.053  $\mu\text{g/mL}$ .
